# Supplementary material for: Causal impact of genetically-determined fish and fish oil intake on epigenetic age acceleration and related serum markers
Source: Springer Nature journal article supplement (doi:10.1186/s40246-025-00756-3), 2025-05-23
Supplement: MOESM1 [file 40246_2025_756_MOESM1_ESM.pdf]

## 8 Supplementary Figures

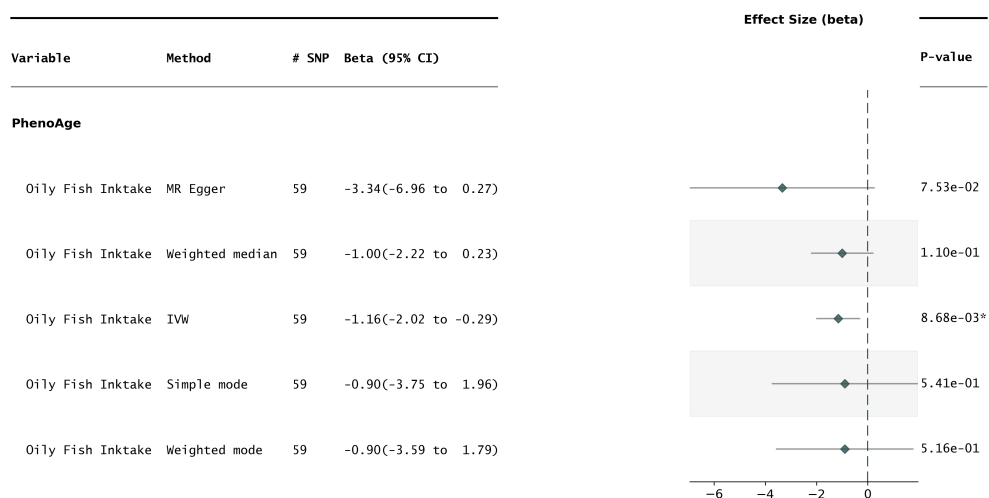

**Fig. 1S All 5 MR Methods for Oily Fish Intake vs PhenoAge** Forest plot showing additional MR methods of simple mode, weighted mode, and weighted median for this statistically significant exposure outcome pair.

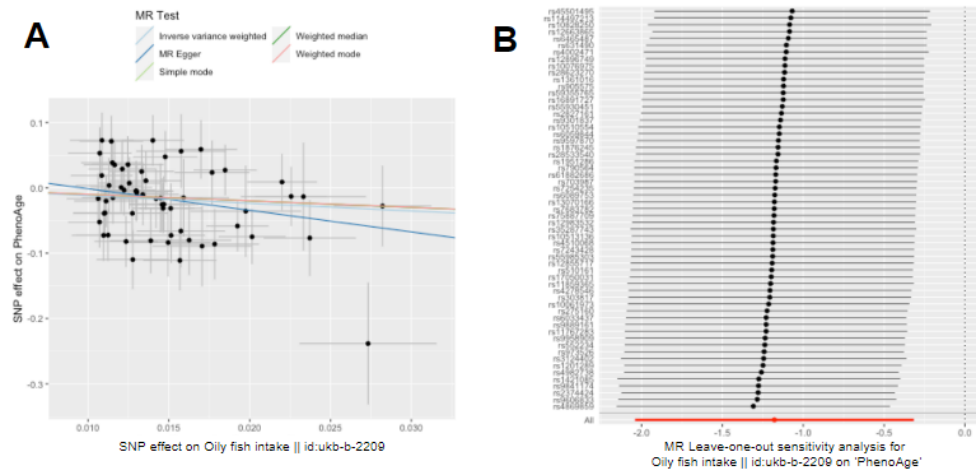

**Fig. 2S Sensitivity Analysis of Oily Fish Intake on PhenoAge.** Scatter plot of IV effects on 5 MR methods (A) and LOO analysis (B) used to assess the robustness of the causal estimate of oily fish intake on PhenoAge.

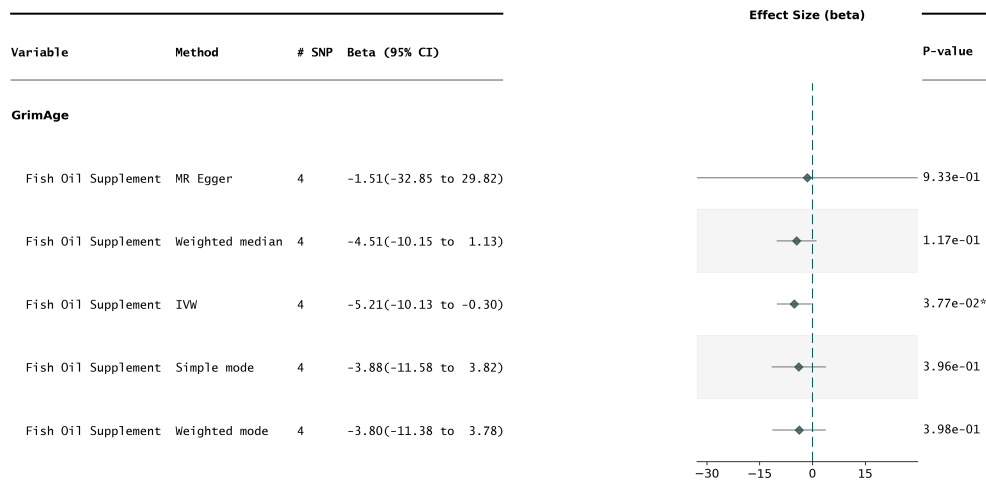

**Fig. 3S All 5 MR Methods for Fish Oil vs GrimAge** Forest plot showing additional MR methods of simple mode, weighted mode, and weighted median for this statistically significant exposure outcome pair.

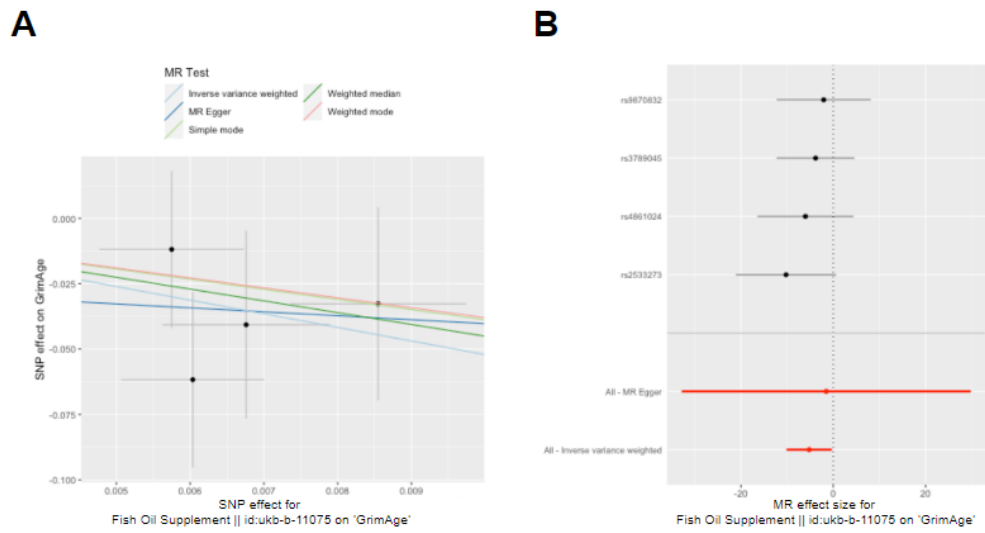

**Fig. 4S Sensitivity Analysis of Fish Oil Intake on GrimAge.** Scatter plot of IV effects on 5 MR methods (A) and LOO analysis (B) used to evaluate the robustness of the causal estimate of fish oil intake on GrimAge

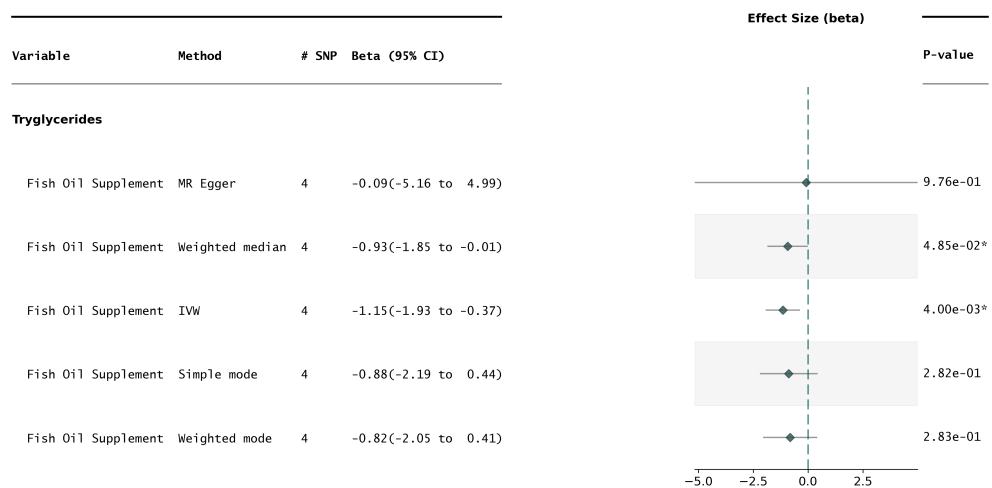

**Fig. 5S All 5 MR Methods for Fish Oil vs Triglycerides** Forest plot showing additional MR methods of simple mode, weighted mode, and weighted median for this statistically significant exposure outcome pair.

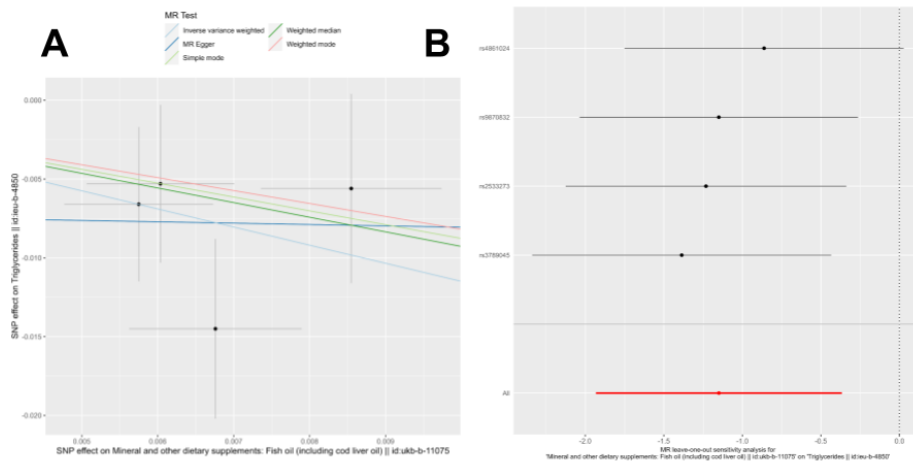

**Fig. 6S Fish Oil Triglycerides Sensitivity** Scatter plot of IV effects on 5 MR methods (A) and LOO analysis (B) used to assess the robustness of the causal estimate of fish oil supplementation on triglycerides.

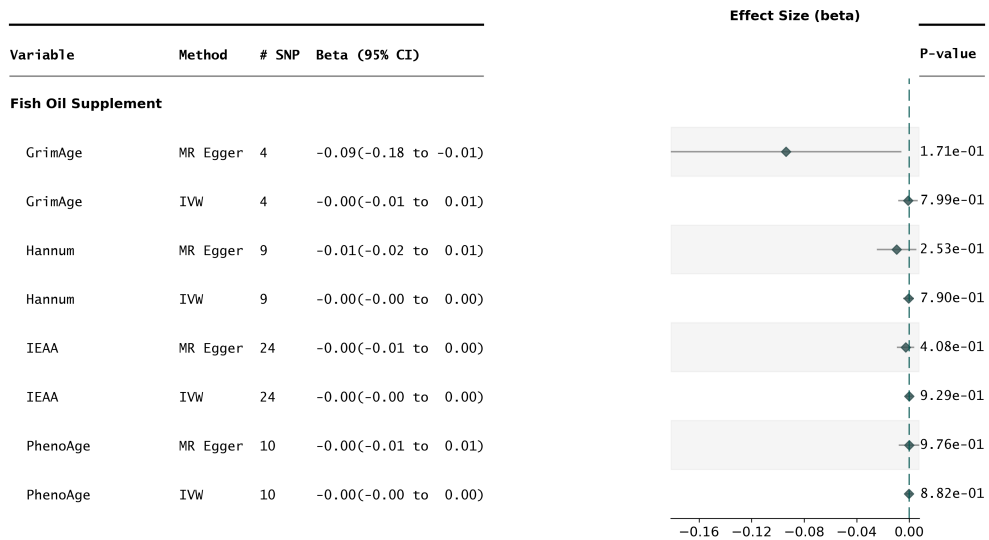

**Fig. 7S Reverse MR of Epigenetic Age Measures vs Fish Oil Intake.** Beta coefficients and p-values used to represent the potential impact of four epigenetic age measures on fish oil intake. No significant associations were observed.

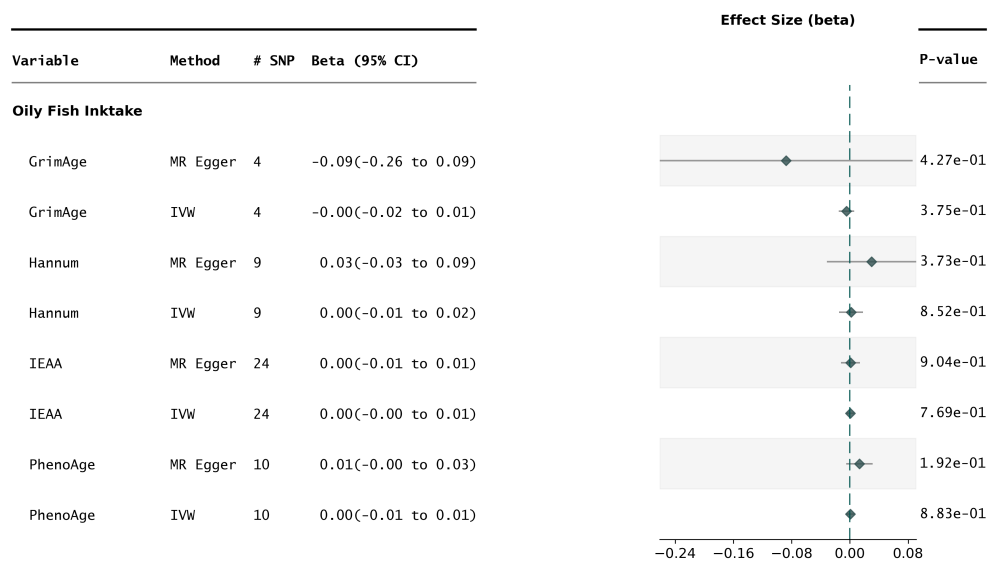

**Fig. 8S Reverse MR of Epigenetic Age Measures vs Oily Fish Intake.** Beta coefficients and p-values used to depict the potential influence of four epigenetic age measures on oily fish intake. No significant associations were observed.

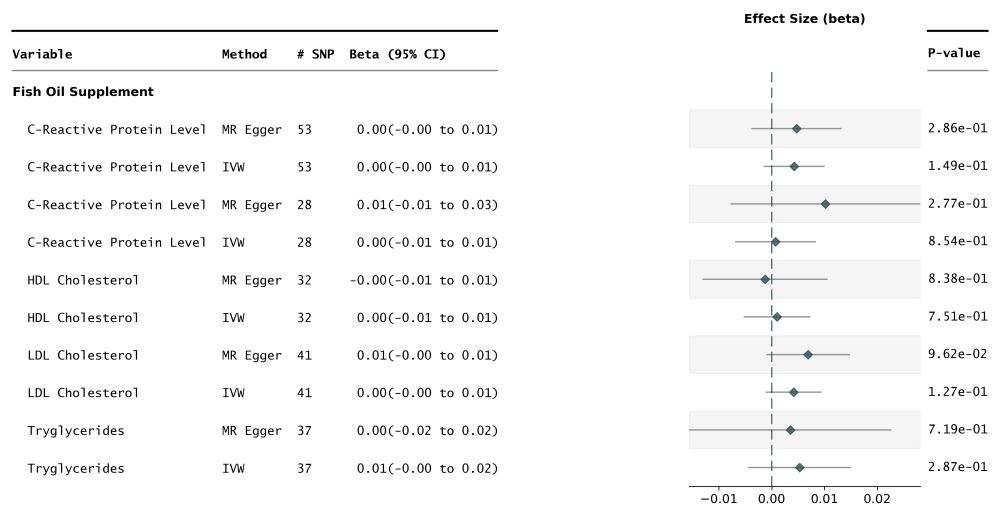

**Fig. 9S Reverse MR of Blood Biomarkers vs Fish Oil Supplement.** Beta coefficients and p-values illustrating the influence of blood biomarkers on fish oil supplementation. No significant associations found.



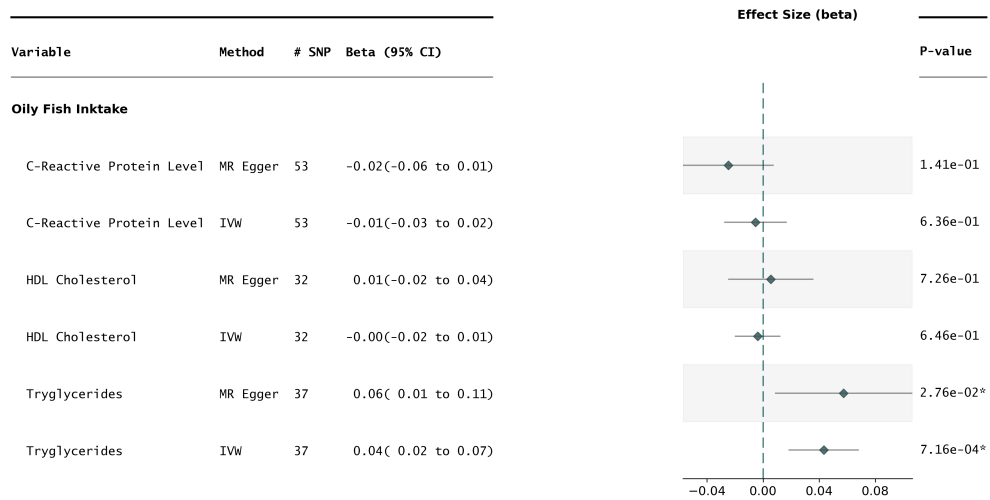

**Fig. 10S Reverse MR of Blood Biomarkers vs Oily Fish Intake.** Beta coefficients and p-values demonstrating the influence of blood biomarkers on oily fish intake. Significant reverse MR associations ( $p < 0.05$ ) were found for LDL cholesterol and triglycerides on oily fish intake.
